# Supplementary material for: Prior oxidation of Ni substrates increases the number of active sites in Ni3S2 obtained by sulfidation and enhances its multifunctional electrocatalytic activity
Source: Royal Society of Chemistry journal article supplement (doi:10.1039/d3ta07513c), 2024-01-01
Supplement: d3ta07513c1.pdf [file d3ta07513c1.pdf]

## Electronic Supplementary Information

### **Prior Oxidation of Ni Substrate Increases Number of Active Sites in Ni<sub>3</sub>S<sub>2</sub> Obtained by Sulfidation and Enhances Its Multifunctional Electrocatalytic Activity**

Anantharaj Sengeni<sup>1,2,3\*</sup> and Suguru Noda<sup>2,3</sup>

<sup>1</sup>. Laboratory for Electrocatalysis and Energy, Department of Chemistry, Indian Institute of Technology, Kanpur 208 016, Uttar Pradesh, India

<sup>2</sup>. Department of Applied Chemistry, School of Advanced Science and Engineering, Waseda University, 3-4-1 Okubo, Shinjuku-ku, Tokyo 169-8555, Japan

<sup>3</sup>. Waseda Research Institute for Science and Engineering, Waseda University, 3-4-1 Okubo, Shinjuku-ku, Tokyo 169-8555, Japan

\* Correspondence should be addressed to: [ananths@iitk.ac.in](mailto:ananths@iitk.ac.in), and [anantharajsengeni@gmail.com](mailto:anantharajsengeni@gmail.com)

### Determination of loading of Ni<sub>3</sub>S<sub>2</sub>-O/Ni:

The mass loading of a catalyst grown on a substrate is calculated using the formula given below.

Loading of Ni<sub>3</sub>S<sub>2</sub>-O/Ni

$$= \text{increase in mass as Ni}_3\text{S}_2 \times \text{MW}_{\text{NiS}_2/3} / (\text{MW}_{\text{NiS}_2/3} - \text{MW}_{\text{Ni}})$$

$$+ \text{increase in mass as Ni(OH)}_2 \times \text{MW}_{\text{Ni(OH)}_2} / (\text{MW}_{\text{Ni(OH)}_2} - \text{MW}_{\text{Ni}})$$

Please note that though the catalyst is identified as Ni<sub>3</sub>S<sub>2</sub>-O/Ni, the 'O' in the same stands for Ni(OH)<sub>2</sub> resulted from the peroxidation of the substrate. From the Ni 2p<sub>3/2</sub> XPS spectrum (Figure 3a), we could see that the two deconvoluted Ni<sup>2+</sup> peaks (assigned to NiO and Ni(OH)<sub>2</sub>) are having almost the same area under the peak and Ni<sup>2+</sup> assigned to NiO could also be assigned to Ni<sup>2+</sup> in Ni<sub>3</sub>S<sub>2</sub>. Hence, we can assume that the half of surface Ni is in Ni<sub>3</sub>S<sub>2</sub> while the remaining half is in Ni(OH)<sub>2</sub>. Since the mass increase via conversion of 1 mol Ni to 1 mol Ni<sub>3</sub>S<sub>2</sub> is 21.4 g (Ni+2/3S→1/3Ni<sub>3</sub>S<sub>2</sub>) and that to 1 mol Ni(OH)<sub>2</sub> is 34.0 g (Ni+2OH→Ni(OH)<sub>2</sub>), it is attributed that 21.4/(21.4+34.0)×100% = 38.6% of the measured increase in weight to Ni<sub>3</sub>S<sub>2</sub> and 34.0/(21.4+34.0)×100% = 61.4% of the measured increase in weight to Ni(OH)<sub>2</sub> and calculated the total mass of Ni<sub>3</sub>S<sub>2</sub>-O on Ni to be ~0.6 mg cm<sup>-2</sup> as follows.

$$\text{Total increase in weight after 100 s of anodization} = 0.181 \text{ mg cm}^{-2}$$

$$38.6\% \text{ of total increase in weight corresponding to Ni}_3\text{S}_2 \text{ in Ni}_3\text{S}_2\text{-O on Ni} = 0.070 \text{ mg cm}^{-2}$$

$$61.4\% \text{ of total increase in weight corresponding to Ni(OH)}_2 \text{ in Ni}_3\text{S}_2\text{-O on Ni} = 0.111 \text{ mg cm}^{-2}$$

Hence,

Loading of Ni<sub>3</sub>S<sub>2</sub> in Ni<sub>3</sub>S<sub>2</sub>-O on Ni

$$= 0.070 \text{ mg cm}^{-2} \times ((240.2 \text{ g mol}^{-1}/3)/(21.4 \text{ g mol}^{-1})) = 0.262 \text{ mg cm}^{-2}$$

Loading of Ni(OH)<sub>2</sub> in Ni<sub>3</sub>S<sub>2</sub>-O on Ni

$$= 0.111 \text{ mg cm}^{-2} \times (92.7 \text{ g mol}^{-1})/(34.0 \text{ g mol}^{-1}) = 0.303 \text{ mg cm}^{-2}$$

Hence, the total loading of Ni<sub>3</sub>S<sub>2</sub>-O on Ni

$$= 0.262 \text{ mg cm}^{-2} + 0.303 \text{ mg cm}^{-2} = 0.565 \text{ mg cm}^{-2} \approx \mathbf{0.6 \text{ mg cm}^{-2}}$$

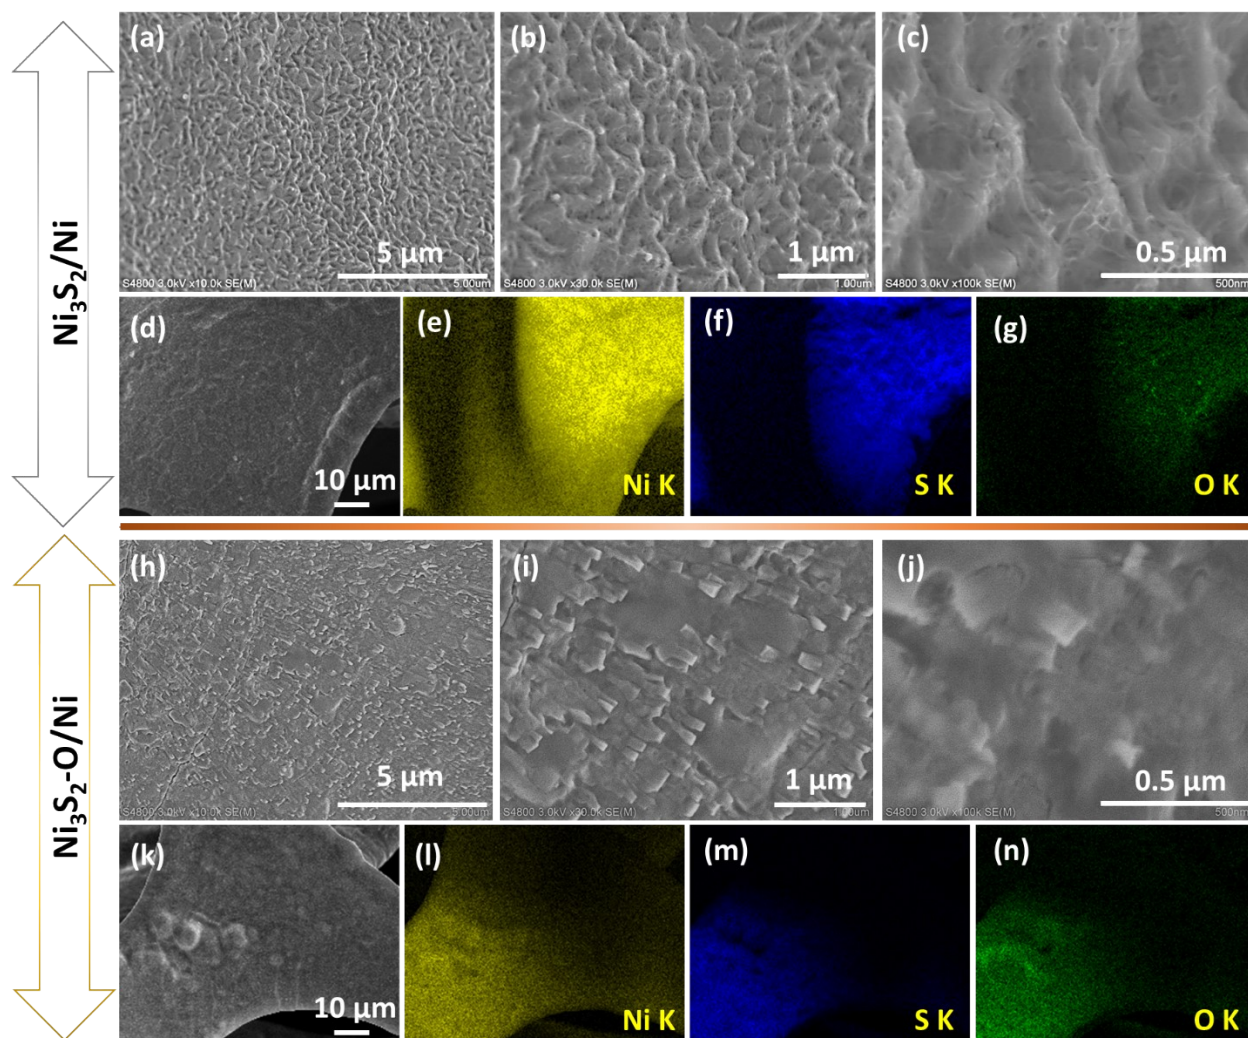

**Figure S1:** (a-c) SEM micrographs of  $\text{Ni}_3\text{S}_2/\text{Ni}$  with increasing magnifications. (d) Low-magnification SEM micrograph illustrating the position of  $\text{Ni}_3\text{S}_2/\text{Ni}$  where the elemental EDS mapping was conducted for Ni (e), S (f), and O (g). (h-n) A similar set of SEM micrographs, low-magnification SEM micrograph showing the position of  $\text{Ni}_3\text{S}_2\text{-O}/\text{Ni}$  where elemental EDS mapping for the same set of elements was performed for  $\text{Ni}_3\text{S}_2\text{-O}/\text{Ni}$ , and the corresponding elemental maps in the same order.

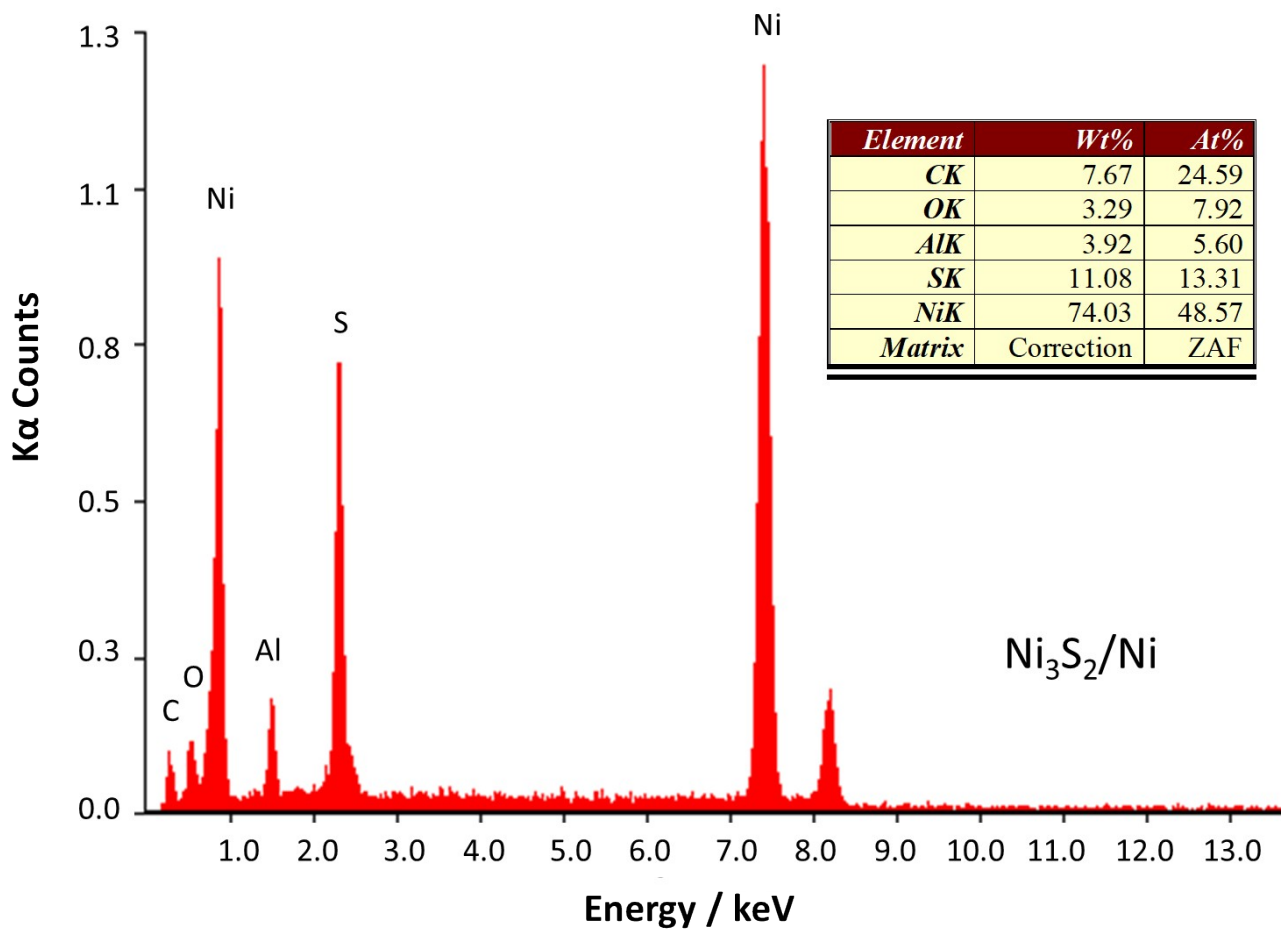

**Figure S2:** Energy dispersive X-ray spectrum of  $\text{Ni}_3\text{S}_2/\text{Ni}$  with the elemental composition in the table given as inset.

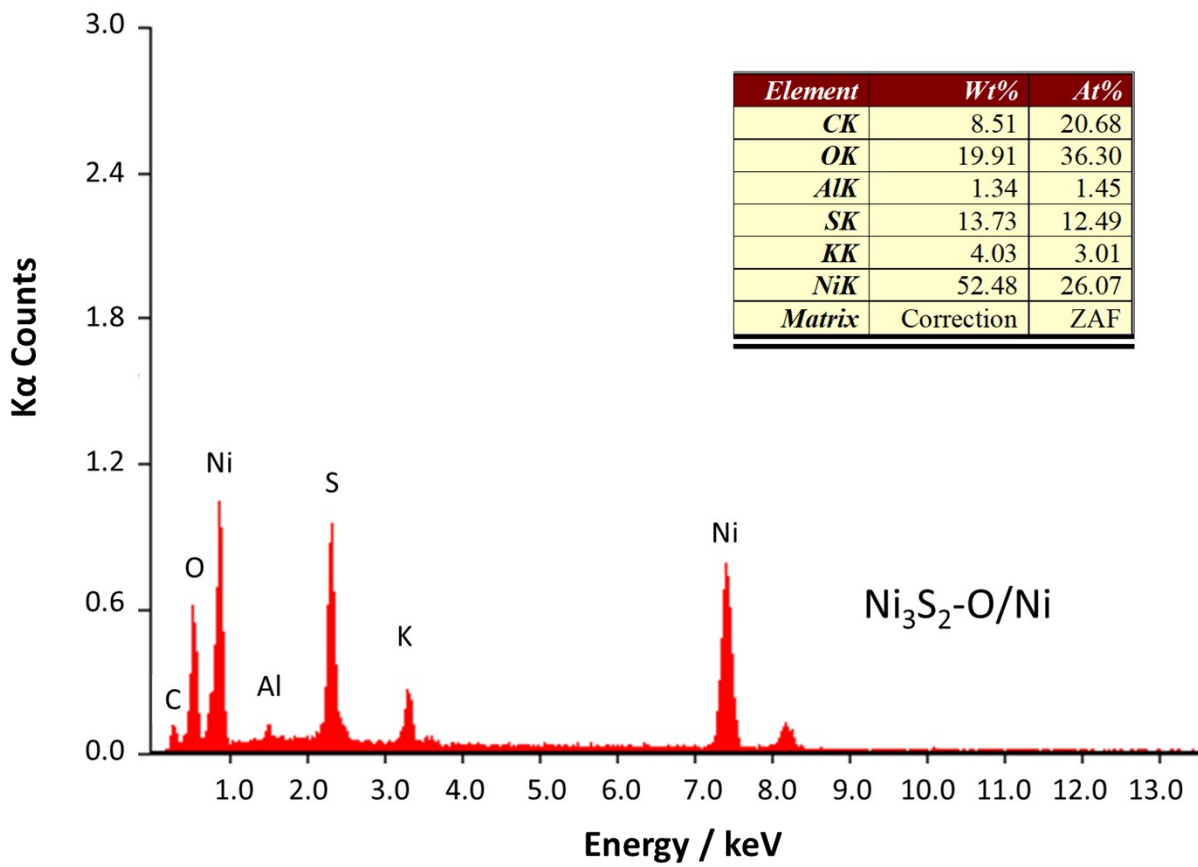

**Figure S3:** Energy dispersive X-ray spectrum of  $\text{Ni}_3\text{S}_2\text{-O/Ni}$  with the elemental composition in the table given as inset.

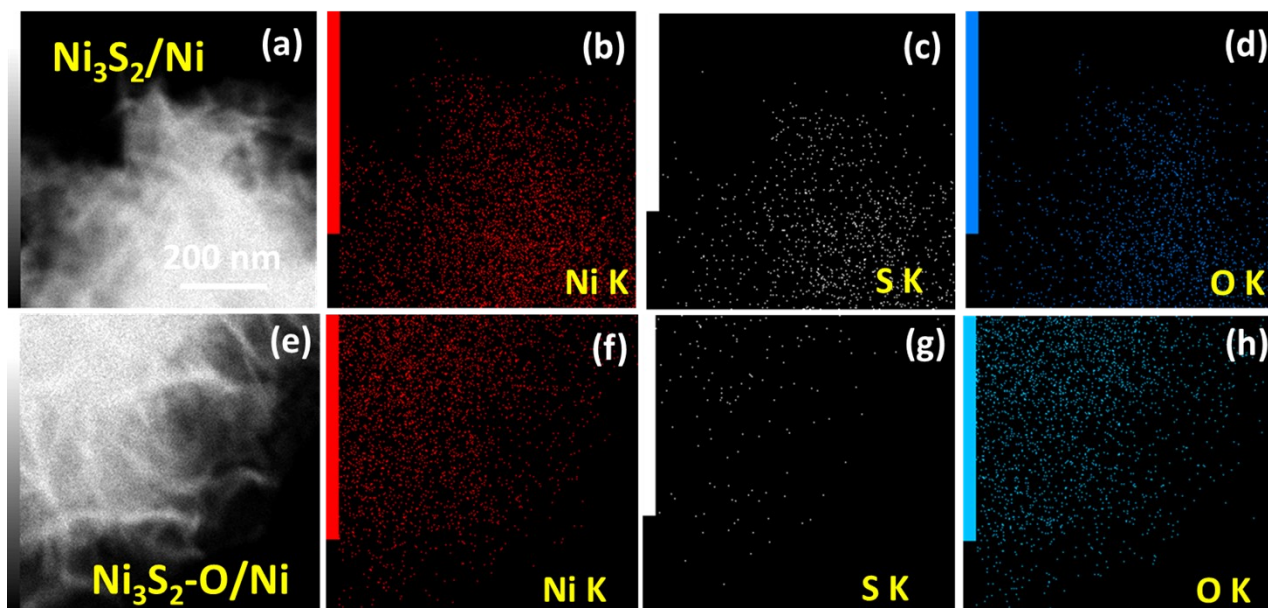

**Figure S4:** (a-d) STEM-HAADF image of  $\text{Ni}_3\text{S}_2/\text{Ni}$  with EDS elemental mapping of Ni (b), S (c), and O (d), respectively. (e-h) A similar set of STEM-HAADF image and elemental maps for the same elements in  $\text{Ni}_3\text{S}_2\text{-O}/\text{Ni}$ .

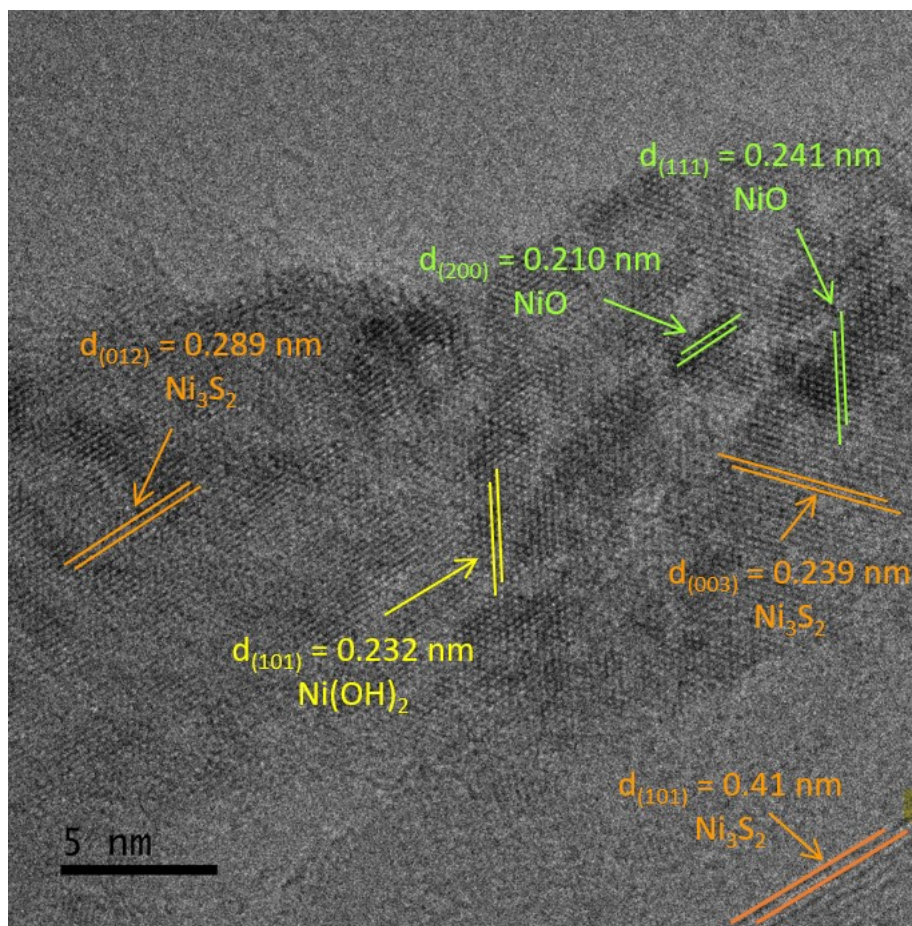

**Figure S5:** HRTEM image of  $\text{Ni}_3\text{S}_2\text{-O/Ni}$  showing the lattice planes of  $\text{Ni}_3\text{S}_2$ ,  $\text{NiO}$ , and  $\text{Ni}(\text{OH})_2$  planes adjacent to one another.

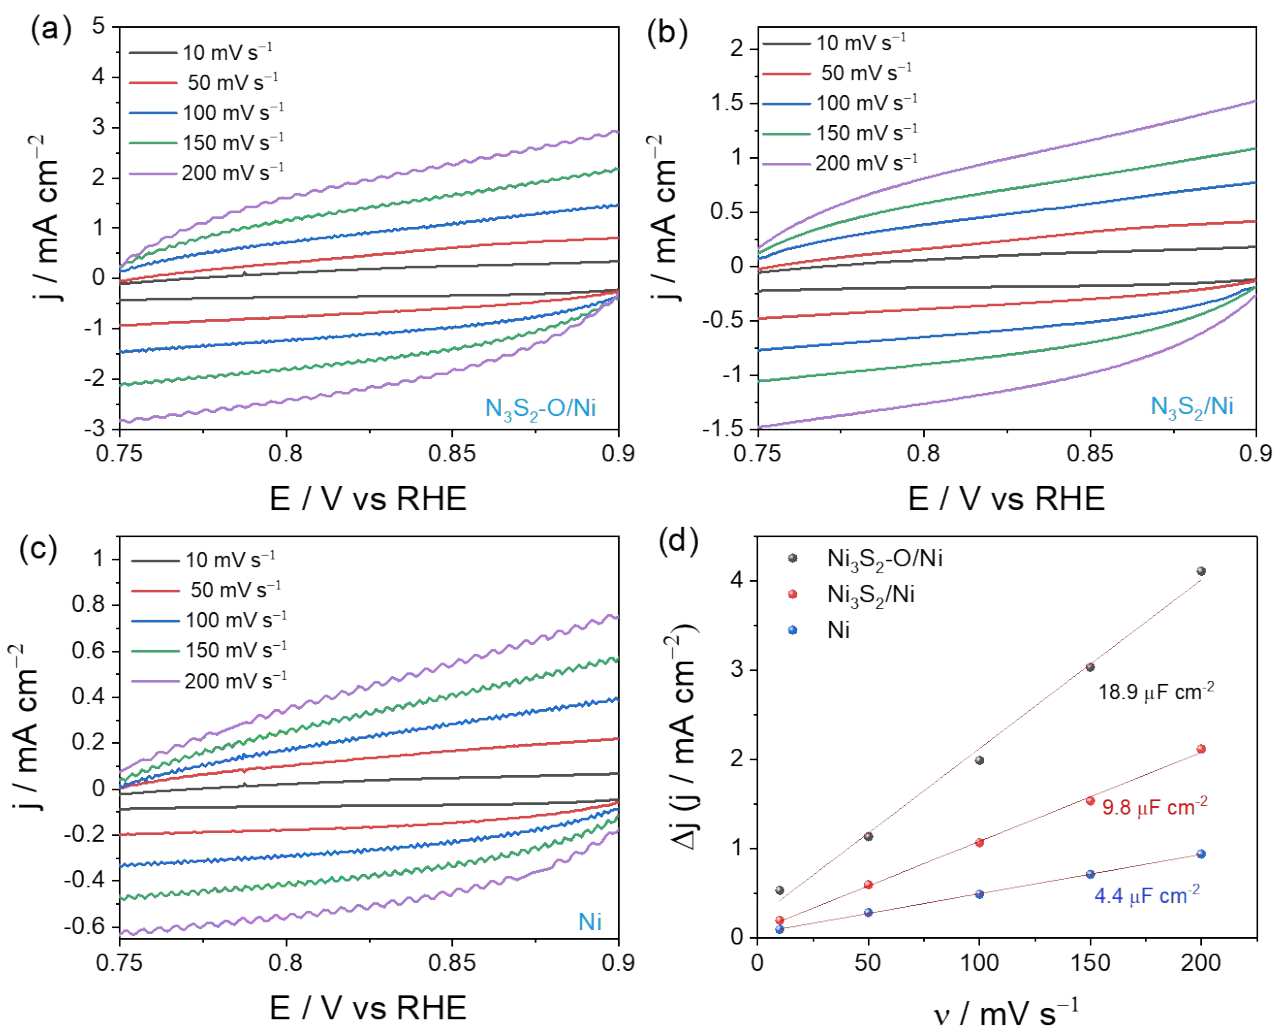

**Figure S6:** CVs of Ni foam and  $Ni_3S_2-O/Ni$  in 1.0 M KOH with increasing scan rate in a non-Faradaic region. (c) Plot of difference in the double-layer charging current against scan rates.



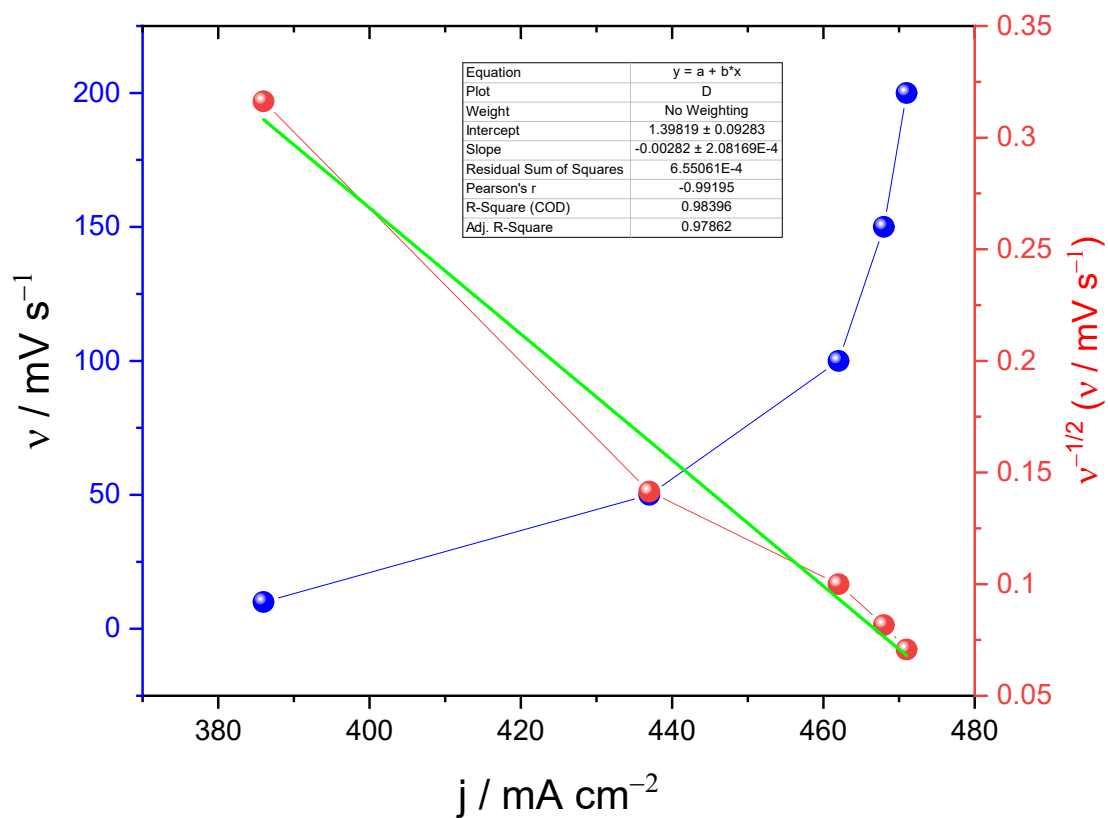

**Figure S7:** Plot of scan rate (blue) and inverse of the square root of the scan rate vs the MOR current density of Ni<sub>3</sub>S<sub>2</sub>-O/Ni in 1.0 M KOH containing 0.5 M methanol at the anodic vertex potential (1.724 V vs RHE).

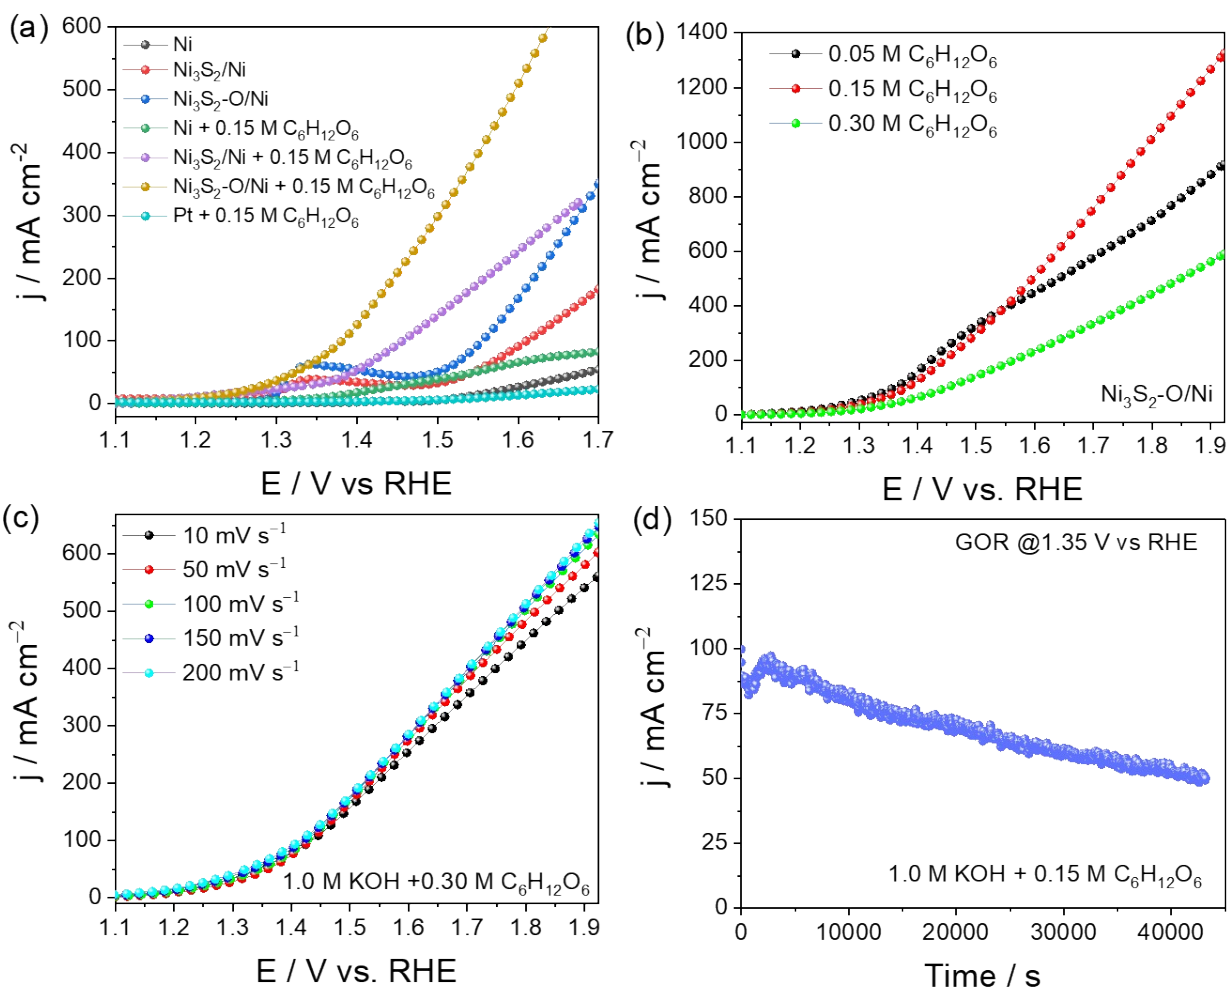

**Figure S8:** (a) GOR LSVs of Ni<sub>3</sub>S<sub>2</sub>-O/Ni and Ni foam in 1.0 M KOH containing 0.15 M glucose recorded at 10 mV s<sup>-1</sup> in comparison with the LSVs obtained only in 1.0 M KOH. (b) GOR LSVs of Ni<sub>3</sub>S<sub>2</sub>-O/Ni showing the concentration effect. (c) GOR LSVs of Ni<sub>3</sub>S<sub>2</sub>-O/Ni showing the scan rate effect. (d) CA response of Ni<sub>3</sub>S<sub>2</sub>-O/Ni at 1.35 V vs RHE in 1.0 M KOH containing 0.15 M glucose.

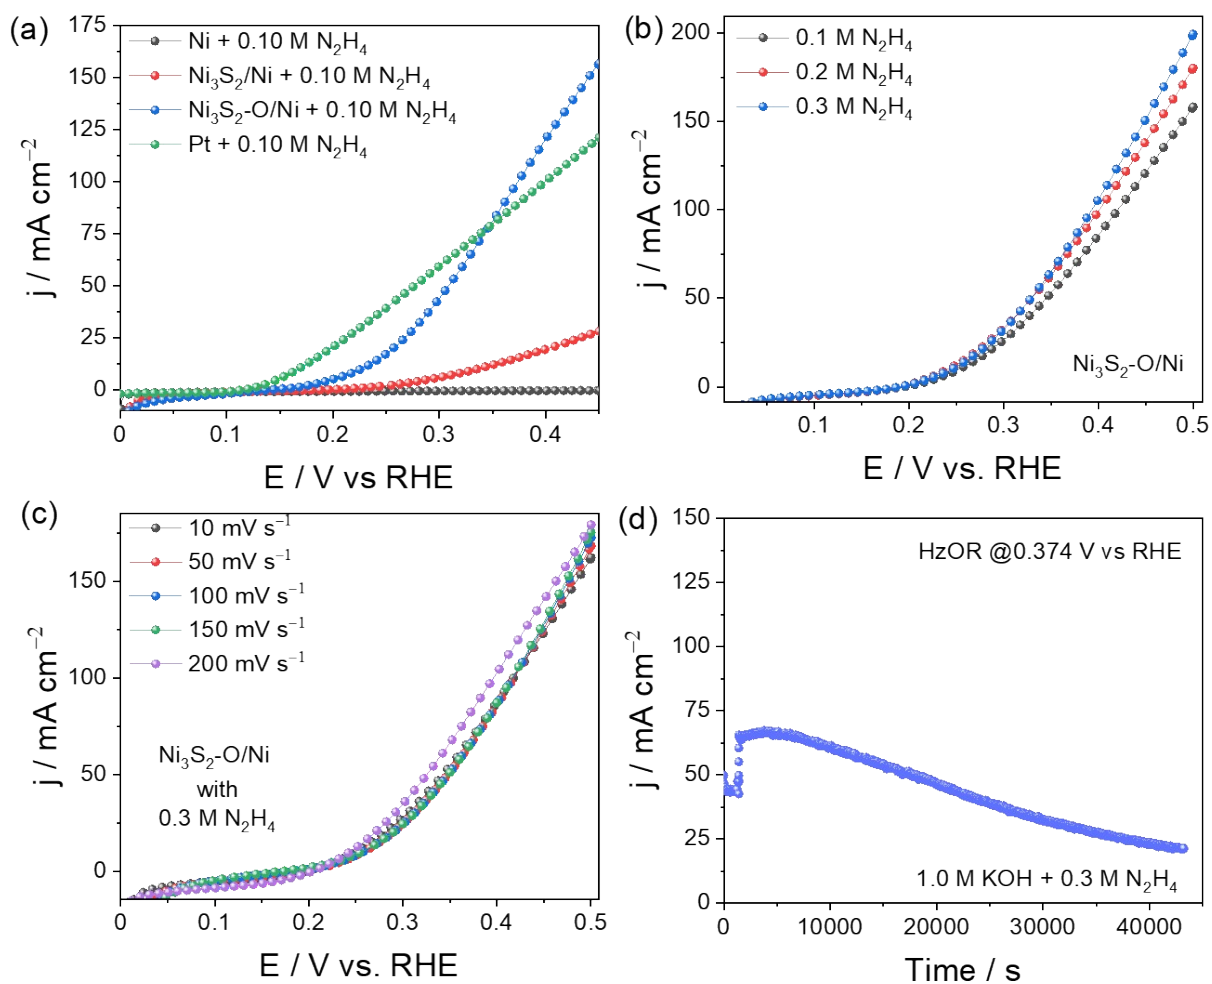

**Figure S9:** (a) HzOR LSVs of Ni<sub>3</sub>S<sub>2</sub>-O/Ni and Ni foam in 1.0 M KOH containing 0.10 M hydrazine obtained at 10 mV s<sup>-1</sup> and provided in comparison with the LSVs obtained only in 1.0 M KOH solution. (b) HzOR LSVs of Ni<sub>3</sub>S<sub>2</sub>-O/Ni showing the concentration effect. (c) HzOR LSVs of Ni<sub>3</sub>S<sub>2</sub>-O/Ni showing the scan rate effect. (d) CA response of Ni<sub>3</sub>S<sub>2</sub>-O/Ni at 0.374 V vs RHE in 1.0 M KOH containing 0.10 M hydrazine.

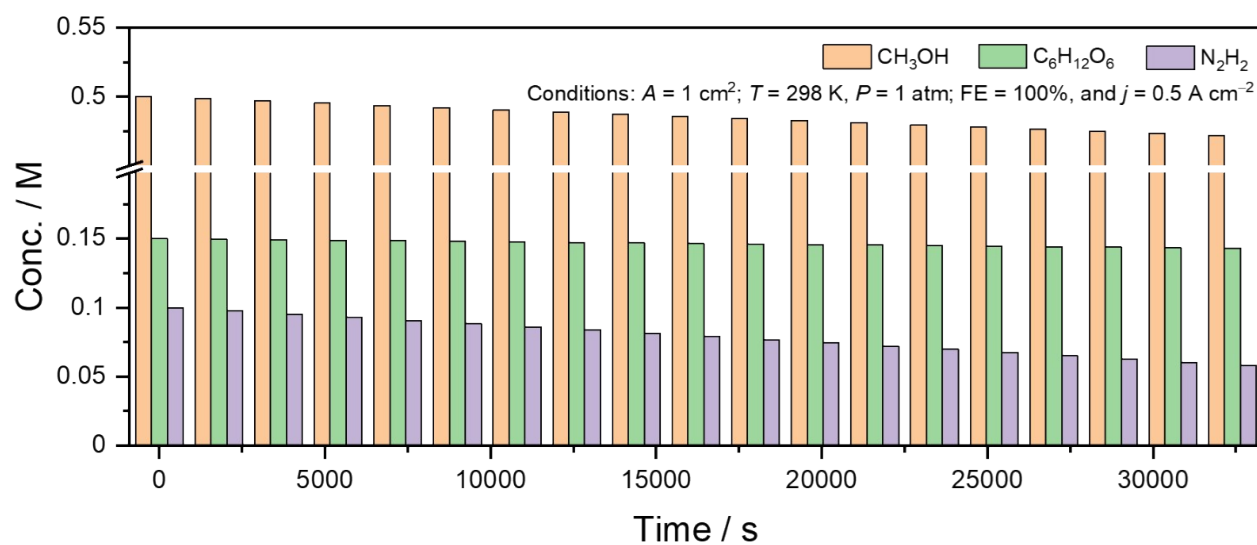

**Figure S10:** Calculated trend of change in concentrations of methanol (saffron), glucose (green), and hydrazine (purple) over time at prescribed conditions.
